# Supplementary material for: Health Behavior and Cancer Prevention among Adults with Li-Fraumeni Syndrome and Relatives in Germany—A Cohort Description
Source: MDPI journal article supplement (doi:10.3390/curroncol29100614), 2022-10-15
Supplement: s1 [file s1]

# Translated self-designed questionnaire

## 1. Demographic Data

1. When did you/your relative receive the Li-Fraumeni-Syndrome diagnosis? Please enter quarter and year.
2. Your date of birth:
3. You are:
  - Female
  - Male
  - Divers
4. Your marital status:
  - Single
  - Single Parent
  - Living in a partnership
  - Married
  - Divorced/separated
  - Widowed
5. Highest school-leaving qualification
  - None
  - Special school certificate
  - Lower secondary
  - High School
  - College
  - University
  - Other
6. How much do you weigh?
7. How tall are you?
8. Your current occupation:
  - Scholar/Student
  - Unemployed/Seeking a job
  - Freelancer
  - Housewife
  - Employee
  - Public Servant
  - Pensioner
  - Other
9. Do you have children?
  - No
  - Yes: Please enter Age and Sex
  - Child 1
  - Child 2
  - Child 3
  - Child 4
  - Child 5
10. Have you ever had cancer in your life?
  - Yes

- No
11. Did one of your children have cancer?  
Yes  
No
12. Have you lost a child to cancer?  
Yes  
No
13. What kind of health insurance do you have?  
State  
Private
14. What is your average monthly net household income? (€)
15. Do you smoke?  
Yes  
No  
Previously, but not for \_\_\_\_\_ years
16. How long have you smoked? How long did you smoke before? (years)
17. How much do (did) you smoke (before)? (Cigarettes per day)
18. How often do you drink alcohol?  
Never  
Once a month  
2-4 times a month  
2-3 times per week  
4 or more times per week
19. If you drink alcohol in a day, how many alcoholic beverages do you typically drink? One glass of alcohol corresponds to: 0.33 L beer 0.25 L wine or sparkling wine 0.02 L spirits  
I never drink alcohol  
1-2  
3-4  
5-6  
7-8  
10 or more

## 2. Surveillance Program

Do you/Does your relative regularly participate in the recommended health and early detection examinations?

- Yes, as recommended  
Yes, but not all of them  
Yes, but less often  
No, not anymore  
No, never  
Don't know

How high do you estimate your personal risk of developing cancer? \_\_\_\_\_ %

For relatives only: How high do you estimate the risk of your relative(s) getting cancer (again)? \_\_\_\_\_ %

How high do you estimate the risk of developing cancer in the average population?  
\_\_\_\_\_ %
